# Supplementary material for: Is there a placental microbiota? A critical review and re-analysis of published placental microbiota datasets
Source: Springer Nature journal article supplement (doi:10.1186/s12866-023-02764-6), 2023-03-18
Supplement: MOESM1 [file 12866_2023_2764_MOESM1_ESM.pdf]

## **Figure S1. World map of study locations**

World map indicating the locations of studies included in this re-analysis.

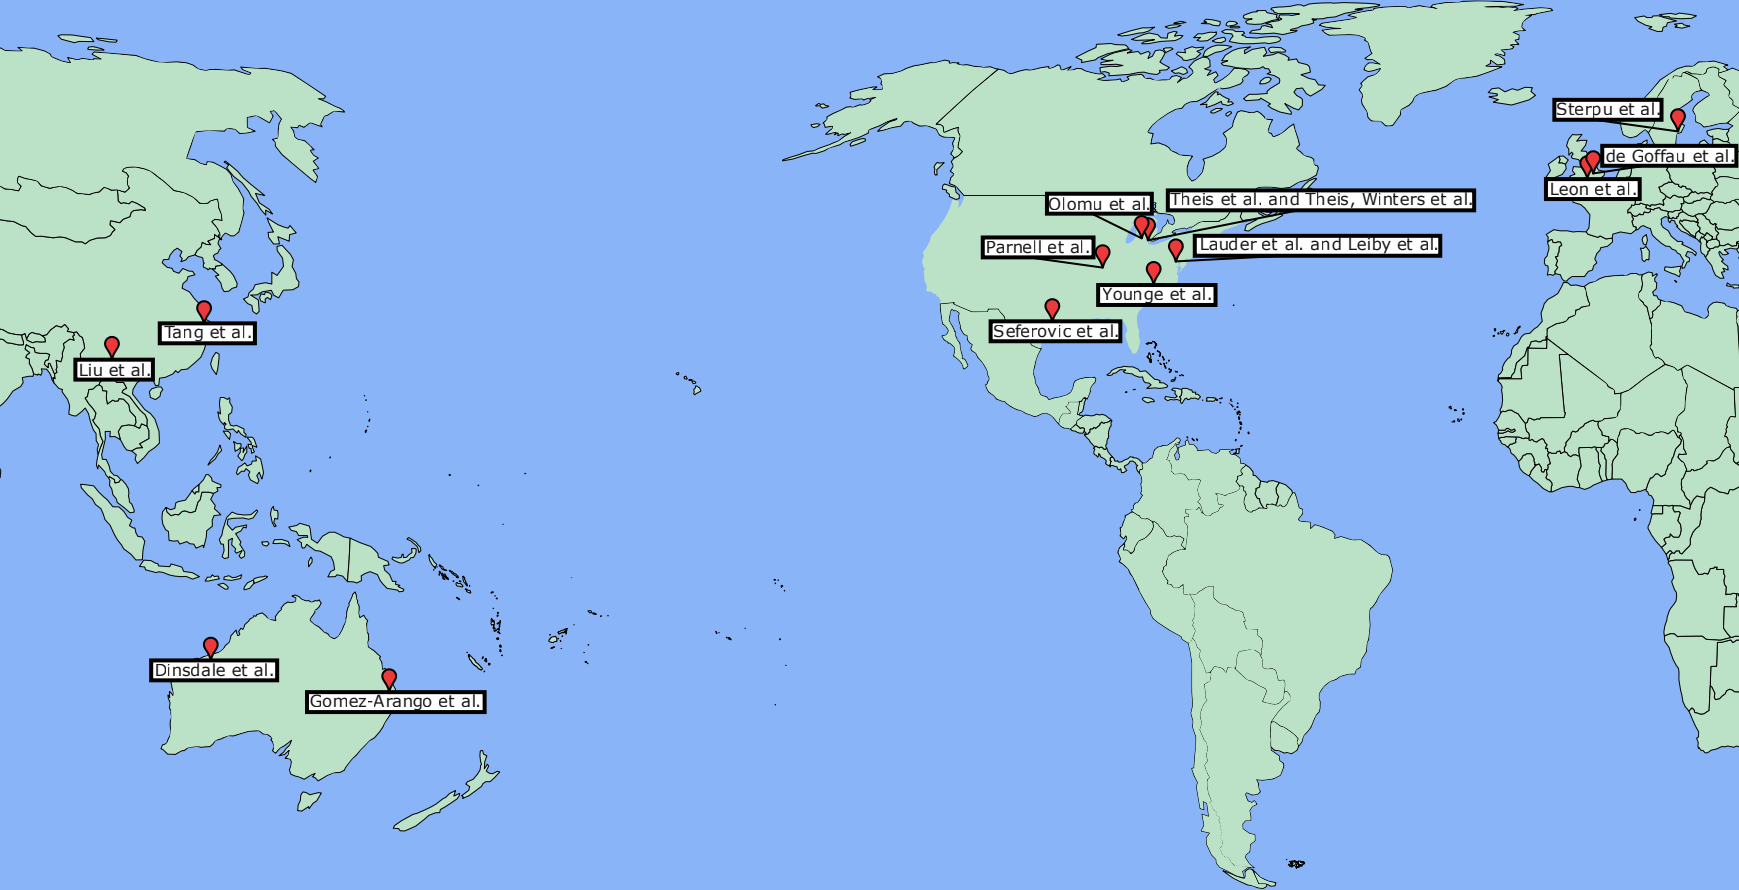

**Table S1. Summary of the genus level classifications of prominent bacterial ASVs across studies unable to be subset to placentas from term cesarean deliveries before and after use of the R package DECONTAM to remove likely background DNA contaminants**

Top five ASV genus level classifications as determined by mean relative abundance across placental samples after DADA2 processing for studies which had ASVs greater than 1% mean relative abundance across all placental samples. The de Goffau et al. and Tang et al. studies were omitted from the table because there were no ASVs which contributed on average more than 1% to placental sample reads; however, reads from *Cutibacterium* and *Romboutsia* were most predominant in the de Goffau and Tang datasets, respectively. The 16S rRNA gene hypervariable regions sequenced are included, as well as why placental samples in a study could not be subset to only cesarean term delivered samples. Asterisks indicate ASV sequence genus level classifications which were assigned to type strains by NCBI BLAST with the highest percent identity in excess of 95%.

| Study          | 16S rRNA gene hypervariable region | Before DECONTAM             |                        |                             |                                    |                         |
|----------------|------------------------------------|-----------------------------|------------------------|-----------------------------|------------------------------------|-------------------------|
|                |                                    | ASV1                        | ASV2                   | ASV3                        | ASV4                               | ASV5                    |
|                |                                    | Fetal-side <sup>a</sup>     |                        |                             |                                    |                         |
| Olomu          | V4                                 | <i>Escherichia/Shigella</i> | <b>Lactobacillus</b>   | <b>Lactobacillus</b>        | <i>Finegoldia</i>                  | <i>Fenollaria</i>       |
| Theis          | V4                                 | <i>Achromobacter</i>        | <i>Delftia</i>         | <i>Phyllobacterium</i>      | <i>Clostridium sensu stricto 5</i> | <i>Stenotrophomonas</i> |
| Theis, Winters | V4                                 | <i>Escherichia/Shigella</i> | <i>Staphylococcus</i>  | <i>Serratia</i> *           | <i>Cupriavidus</i>                 | <i>Corynebacterium</i>  |
| Sterpu         | V6-V8                              | <i>Cutibacterium</i>        | <i>Staphylococcus</i>  | <i>Streptococcus</i>        | <i>Staphylococcus</i>              | <i>Aggregatibacter</i>  |
|                |                                    | Maternal-side <sup>b</sup>  |                        |                             |                                    |                         |
| Theis, Winters | V4                                 | <i>Escherichia/Shigella</i> | <b>Lactobacillus</b>   | <i>Staphylococcus</i>       | <i>Serratia</i> *                  | <i>Streptococcus</i>    |
| Sterpu         | V6-V8                              | <i>Cutibacterium</i>        | <i>Streptococcus</i>   | <i>Staphylococcus</i>       | <i>Streptococcus</i>               | <i>Streptococcus</i>    |
|                |                                    | After DECONTAM              |                        |                             |                                    |                         |
|                |                                    | ASV1                        | ASV2                   | ASV3                        | ASV4                               | ASV5                    |
|                |                                    | Fetal-side <sup>a</sup>     |                        |                             |                                    |                         |
| Olomu          | V4                                 | <i>Fenollaria</i>           | <i>Acinetobacter</i>   | <b>Lactobacillus</b>        | <i>Campylobacter</i>               | <i>Peptoniphilus</i>    |
| Theis          | V4                                 | <i>Achromobacter</i>        | <i>Alcaligenaceae</i>  | <i>Escherichia/Shigella</i> | <i>Achromobacter</i>               | <i>Alcaligenaceae</i>   |
| Theis, Winters | V4                                 | <i>Serratia</i> *           | <i>Corynebacterium</i> | <i>Cupriavidus</i>          | <i>Corynebacterium</i>             | <i>Achromobacter</i>    |
| Sterpu         | V6-V8                              | <i>Staphylococcus</i>       | <i>Staphylococcus</i>  | <i>Cutibacterium</i>        | <i>Staphylococcus</i>              |                         |
|                |                                    | Maternal-side <sup>b</sup>  |                        |                             |                                    |                         |
| Theis, Winters | V4                                 | <i>Corynebacterium</i>      | <b>Lactobacillus</b>   | <i>Serratia</i> *           | <i>Peptoniphilus</i>               | <i>Corynebacterium</i>  |
| Sterpu         | V6-V8                              | <i>Staphylococcus</i>       | <i>Staphylococcus</i>  | <i>Cutibacterium</i>        | <i>Staphylococcus</i>              |                         |

<sup>a</sup> Samples labeled 'amnion', 'amnion-chorion', 'amnion-chorion interface', 'sub-chorionic plate swab', 'placental parenchyma', 'villous tree' or 'fetal' were categorized as placental samples from the fetal side.

<sup>b</sup> Samples labeled 'decidua' or 'basal plate' were categorized as placental samples from the maternal side.

**Table S2. Summary of the genus level classifications of prominent bacterial ASVs across studies which sampled placental tissues of fetal and maternal origin from term cesarean deliveries without labor**

Results are presented before and after the use of the R package DECONTAM to remove likely background DNA contaminants. The top five ASV genus level classifications as determined by mean relative abundance across placental samples after DADA2 processing are provided for each study. Placental samples are separated based on fetal or maternal origin. Asterisks indicate ASV sequence genus level classifications which were assigned to type strains by NCBI BLAST with the highest percent identity in excess of 95%.

| Study             | Level                | N<br>(placental samples -<br>controls) | Dispersion  |                            | NPMANOVA       |             |                          |
|-------------------|----------------------|----------------------------------------|-------------|----------------------------|----------------|-------------|--------------------------|
|                   |                      |                                        | F Statistic | P value                    | R <sup>2</sup> | F Statistic | P Value                  |
| de Goffau         | Villous tissue       | 77 - 45                                | 6590        | <b>1x10<sup>-106</sup></b> | 0.00825        | 0.999       | 0.636                    |
| Parnell           | Fetal membrane       | 54 - 11                                | 0.0885      | 0.767                      | 0.0159         | 1.02        | 0.339                    |
|                   | Placental villus     | 54 - 11                                | 0.0488      | 0.826                      | 0.0149         | 0.952       | 0.432                    |
|                   | Basal plate          | 55 - 11                                | 0.00526     | 0.942                      | 0.0186         | 1.21        | 0.169                    |
| Olomu             | Placental parenchyma | 23 - 24                                | 0.698       | 0.408                      | 0.016          | 0.731       | 0.75                     |
| Sterpu            | Fetal                | 46 - 6                                 | 12.1        | <b>0.00105</b>             | 0.0736         | 3.97        | <b>0.001<sup>a</sup></b> |
|                   | Middle               | 46 - 6                                 | 4.64        | <b>0.0361</b>              | 0.0761         | 4.12        | <b>0.001<sup>a</sup></b> |
|                   | Decidua              | 43 - 6                                 | 9.46        | <b>0.0035</b>              | 0.0749         | 3.81        | <b>0.001<sup>a</sup></b> |
| Theis             | Amnion-chorion       | 28 - 42                                | 2.04        | 0.158                      | 0.0205         | 1.42        | 0.141                    |
|                   | Villous tree         | 29 - 42                                | 2.02        | 0.16                       | 0.0285         | 2.03        | <b>0.033<sup>b</sup></b> |
| Theis,<br>Winters | Amnion               | 129 - 12                               | 3.67        | 0.0617                     | 0.0862         | 4.43        | <b>0.001<sup>c</sup></b> |
|                   | Amnion-chorion       | 97- 12                                 | 0.23        | 0.635                      | 0.0371         | 1.23        | 0.128                    |
|                   | Subchorion           | 61 - 12                                | 1.12        | 0.302                      | 0.053          | 1.23        | 0.193                    |
|                   | Villous tree         | 48 - 12                                | 0.572       | 0.46                       | 0.0661         | 1.13        | 0.258                    |
|                   | Basal plate          | 114 - 12                               | 0.00843     | 0.927                      | 0.035          | 1.42        | <b>0.041<sup>c</sup></b> |

<sup>a</sup> ADONIS significance is likely to be due to differences in dispersion and unbalanced groups. Regardless, *Staphylococcus* was predominant in samples responsible for significance.

<sup>b</sup> The bacterial profiles of room samples (exposed to room air for 20 minutes), which were predominantly characterized by *Delftia*, *Blastomonas*, and *Achromobacter* from the Theis et al. dataset were responsible for ADONIS significance, which disappeared after their removal from the analysis.

<sup>c</sup> Amnion and basal plate samples driving significance were characterized by *Staphylococcus*, *Corynebacterium*, *Serratia*, and *Cupriavidus*.
